# Supplementary material for: The solvation of nitroxide radicals in ionic liquids studied by high-field EPR spectroscopy
Source: Royal Society of Chemistry journal article supplement (doi:10.1039/c001602k), 2010-01-01
Supplement: c001602k.pdf [file c001602k.pdf]

Supplementary Information for

The Solvation of Nitroxide Radicals in Ionic Liquids Studied by High-field  
EPR Spectroscopy

Yasar Akdogan,<sup>a</sup> Jeannine Heller,<sup>a</sup> Herbert Zimmermann,<sup>b</sup> and Dariush Hinderberger<sup>a\*</sup>

<sup>a</sup>*Max Planck Institute for Polymer Research,  
Ackermannweg 10, 55128 Mainz, Germany.  
Fax: +49 6131 379 100; Tel: +49 6131 379 126  
\* To whom correspondence should be addressed.  
E-mail: [hinderberger@mpip-mainz.mpg.de](mailto:hinderberger@mpip-mainz.mpg.de)*

<sup>b</sup>*Max Planck Institute for Medical Research,  
Jahnstraße 29, 69120 Heidelberg, Germany.*

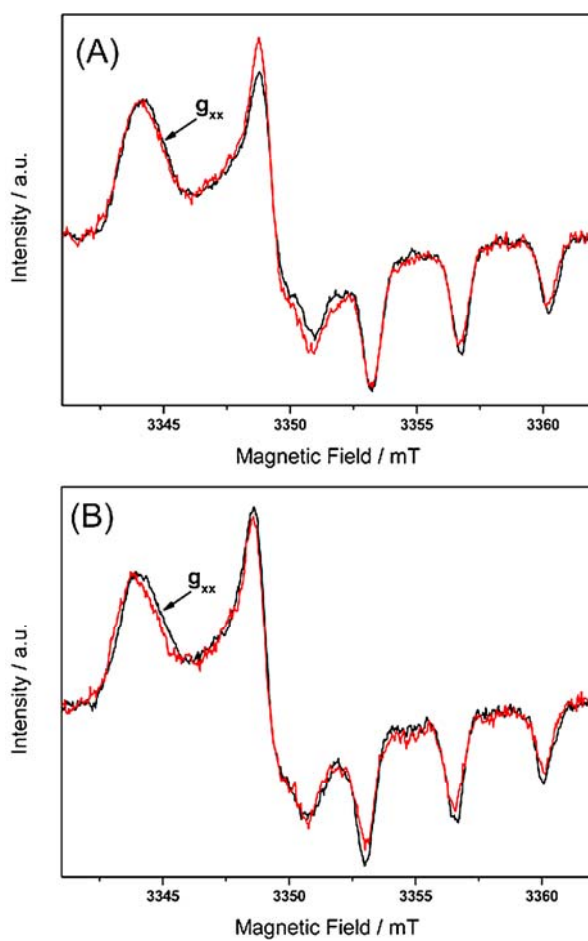

**Figure S1.** Comparison of the pseudomodulated field swept echo detected W-band EPR spectrum of 2mM (A) Cat-1 (B) Tempo-4-carboxylate in EmimBF<sub>4</sub> (black) and HmimBF<sub>4</sub> (red) at 20 K. The arrow illustrates the shift of  $g_{xx}$  values in different solvents.
